# Supplementary material for: Biochemical and immunochemical characterization of venoms from snakes of the genus Agkistrodon
Source: PubMed Central journal article supplement (PMC7285990; doi:10.1016/j.toxcx.2019.100013), 2019-08-02
Supplement: mmc1.pdf [file mmc1.pdf]

## Supplementary information

**Supplementary table 1.** Equine hyperimmunization protocol.

| #  | Immunization |       | Adjuvant |           | Venom |     | Blood sample |
|----|--------------|-------|----------|-----------|-------|-----|--------------|
|    | Date         | Route | Type     | Vol. (ml) | µg    | µl  | Vol. (ml)    |
| 1  | 18-Dec-13    | ID    | IFA      | 1.3       | 100   | 5   | 5            |
| 2  | 24-Dec-13    | SC    | IFA      | 0.7       | 100   | 5   | 5            |
| 3  | 08-Jan-14    | SC    | ALUM     | 0.4       | 200   | 10  | 5            |
| 4  | 22-Jan-14    | SC    | IFA      | 0.7       | 250   | 13  | 5            |
| 5  | 05-Feb-14    | SC    | ALUM     | 0.4       | 500   | 25  | 5            |
| 6  | 19-Feb-14    | SC    | -        | 0         | 1000  | 50  | 5            |
| 7  | 05-Mar-14    | SC    | IFA      | 0.7       | 2000  | 100 | 5            |
| 8  | 19-Mar-14    | SC    | ALUM     | 0.4       | 4000  | 200 | 250          |
| 9  | 02-Apr-14    | SC    | -        | 0         | 5000  | 250 | 250          |
| 10 | 16-Apr-14    | SC    | IFA      | 0.7       | 6000  | 300 | 250          |
| 11 | 30-Apr-14    | SC    | ALUM     | 0.4       | 6000  | 300 | 250          |
| 12 | 14-May-14    | SC    | -        | 0         | 6000  | 300 | 250          |

ID. Intradermal

SC. Subcutaneous

IFA. Incomplete freund adjuvant

ALUM. Alumina

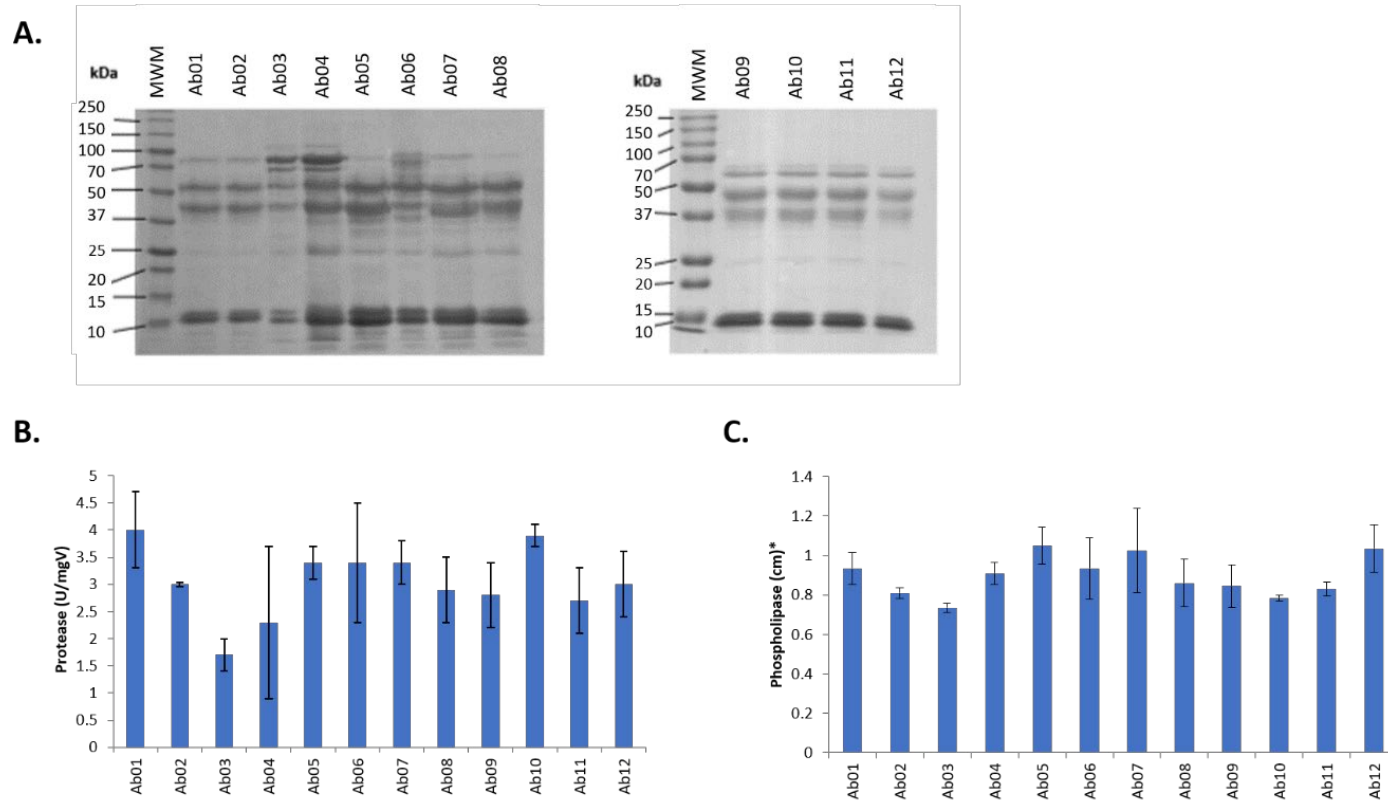

**Supplementary figure 1. Venom variation among adult individuals of *Agkistrodon bilineatus* across its geographical distribution.** A. 15% SDS-PAGE. *MWM*. Molecular weight markers. kDa. Kilodaltons. B. Protease activity on azocasein *U/mgV*. Units per milligram of venom. C. Phospholipase activity measured on agar plates and 10% egg-yolk solution as substrate. *cm*. Diameter of halo in centimeters. *Mexican state of origin of specimens: Ab01*. Colima. *Ab02*. Sinaloa. *Ab03, Ab11 and Ab12*. Morelos. *Ab04*. Nayarit. *Ab05*. Guerrero. *Ab06*. Oaxaca. *Ab07-10*. Chiapas.

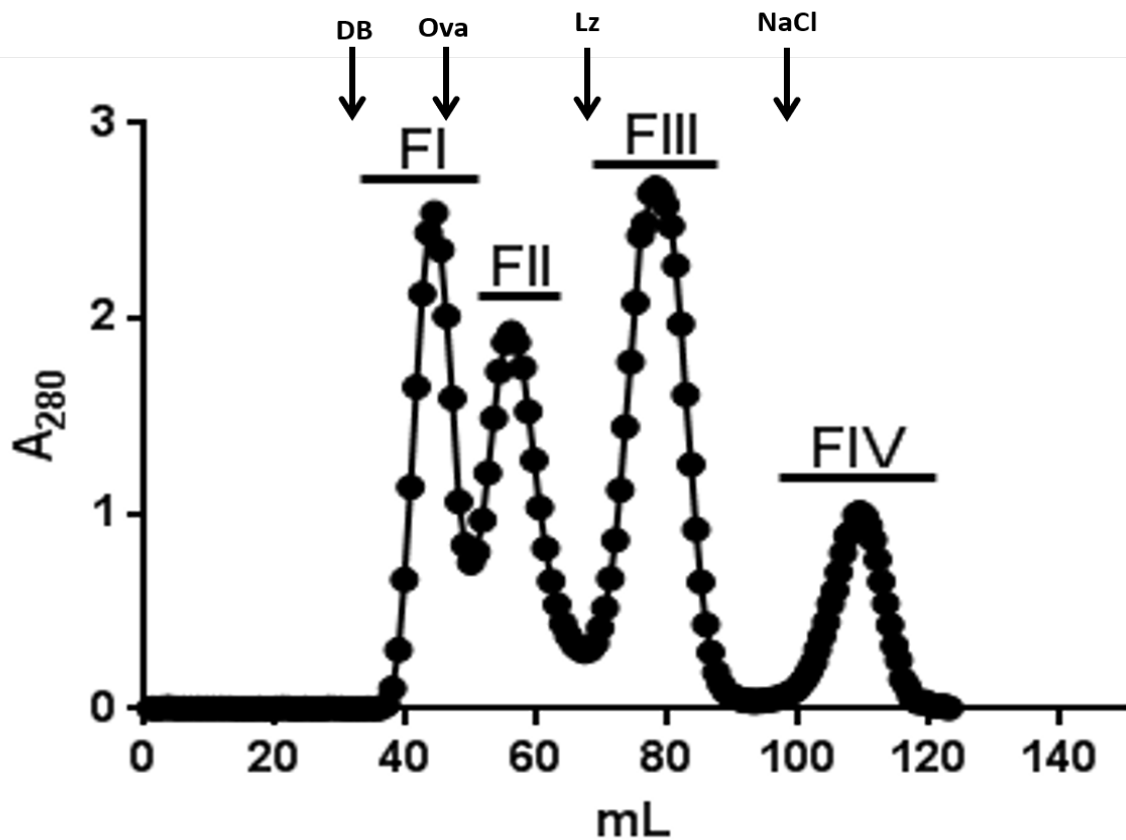

**Supplementary figure 2. Sephadex G<sub>75</sub> gel filtration chromatography of *Agkistrodon bilineatus* venom (80.5 AU<sub>280nm</sub>).** Column equilibrated with PBS, pH 7.2. Dimensions 197 x 90 mm. Total volume 125 mL. Flow speed: 14.2 mL/hr. Elution volume of molecular weight standards is shown with arrows. *DB*. Dextran blue. *Ova*. Ovalbumin. *Lz*. Lizozyme. *NaCl*. Sodium chloride.
